# Supplementary material for: Spatial Patterns of Species Diversity of Amphibians in a Nature Reserve in Eastern China
Source: MDPI journal article supplement (doi:10.3390/biology12030461), 2023-03-16
Supplement: s1 [file s1]

# Spatial Patterns of Species Diversity of Amphibians in a Nature Reserve from Eastern China

Yan-Mei Wang, Hua-Li Hu, Lei Feng, Jing-Yi Chen, Jun-Jie Zhong, Rachel Wan Xin Seah, Guo-Hua Ding

## Supplemental materials

**Table S1.** The transect lines of amphibian monitoring in the Fujian Junzifeng National Nature Reserve from eastern China.

| Mangement district    | Area (km <sup>2</sup> ) | Tracset line ID | Length (km) | Longitude and latitude (°) |                 | Elevational range (m) |
|-----------------------|-------------------------|-----------------|-------------|----------------------------|-----------------|-----------------------|
|                       |                         |                 |             | Starting                   | Ending          |                       |
| Xiafang district (XF) | 93.3                    | XF01            | 8.14        | E116.81, N26.56            | E116.83, N26.54 | 601-1,796             |
|                       |                         | XF02            | 3.51        | E116.85, N26.54            | E116.85, N26.52 | 650-796               |
|                       |                         | XF03            | 3.76        | E116.97, N26.61            | E116.99, N26.59 | 427-647               |
|                       |                         | XF04            | 2.94        | E116.92, N26.60            | E116.93, N26.58 | 430-528               |
|                       |                         | XF05            | 5.25        | E117.00, N26.62            | E117.00, N26.59 | 430-1,251             |
|                       |                         | XF06            | 6.72        | E116.95, N26.61            | E116.94, N26.59 | 429-614               |
| Wannei district (WN)  | 50                      | WN01            | 5.50        | E117.20, N26.51            | E117.22, N26.53 | 547-1,056             |
|                       |                         | WN02            | 3.60        | E117.11, N26.54            | E117.12, N26.53 | 304-361               |
|                       |                         | WN03            | 4.18        | E117.09, N26.54            | E117.12, N26.55 | 332-383               |
|                       |                         | WN04            | 7.39        | E117.17, N26.54            | E117.12, N26.52 | 343-596               |
|                       |                         | WN05            | 4.92        | E117.14, N26.54            | E117.12, N26.55 | 310-407               |
| Ziyun district (ZY)   | 31.3                    | ZY01            | 4.58        | E117.48, N26.36            | E117.47, N26.36 | 563-849               |
|                       |                         | ZY02            | 3.69        | E117.50, N26.33            | E117.50, N26.35 | 453-725               |
|                       |                         | ZY03            | 3.86        | E117.41, N26.35            | E117.43, N26.36 | 210-489               |

**Table S2.** GenBank accession numbers for amphibian species used in the phylogenetic analyses.

| ID | Species                                  | Mitochondrial DNA |           |           |
|----|------------------------------------------|-------------------|-----------|-----------|
|    |                                          | 12S               | 16S       | CO1       |
| 01 | <i>Pachytriton brevipes</i>              | NC_053711         | NC_053711 | NC_053711 |
| 02 | <i>Leptobrachella liui</i>               | MH406642          | MH923370  | MH406371  |
| 03 | <i>Boulenophrys boettgeri</i>            | MH406519          | MH406695  | MH406143  |
| 04 | <i>Boulenophrys sanmingensis</i>         | –                 | MH406697  | MH406145  |
| 05 | <i>Bufo gargarizans</i>                  | NC_008410         | NC_008410 | NC_008410 |
| 06 | <i>Duttaphrynus melanostictus</i>        | NC_005794         | NC_005794 | NC_005794 |
| 07 | <i>Hyla chinensis</i>                    | NC_006403         | NC_006403 | NC_006403 |
| 08 | <i>Hyla sanchiangensis</i>               | MZ508281          | MZ508281  | MZ508281  |
| 09 | <i>Microhyla butleri</i>                 | NC_030049         | NC_030049 | NC_030049 |
| 10 | <i>Microhyla fissipes</i>                | NC_045110         | NC_045110 | NC_045110 |
| 11 | <i>Microhyla heymonsi</i>                | NC_006406         | NC_006406 | NC_006406 |
| 12 | <i>Fejervarya multistriata</i>           | NC_029754         | NC_029754 | NC_029754 |
| 13 | <i>Hoplobatrachus chinensis</i>          | NC_019615         | NC_019615 | NC_019615 |
| 14 | <i>Limnonectes fujianensis</i>           | NC_007440         | NC_007440 | NC_007440 |
| 15 | <i>Quasipaa spinosa</i>                  | NC_013270         | NC_013270 | NC_013270 |
| 16 | <i>Quasipaa exilispinosa</i>             | NC_056269         | NC_056269 | NC_056269 |
| 17 | <i>Amolops ricketti</i>                  | NC_023949         | NC_023949 | NC_023949 |
| 18 | <i>Amolops wuyiensis</i>                 | NC_025591         | NC_025591 | NC_025591 |
| 19 | <i>Sylvirana guentheri</i>               | MN248533          | MN248533  | MN248533  |
| 20 | <i>Hylarana latouchii</i>                | NC_057198         | NC_057198 | NC_057198 |
| 21 | <i>Nidirana adenopleura</i>              | NC_018771         | NC_018771 | NC_018771 |
| 22 | <i>Odorrana graminea</i>                 | NC_050884         | NC_050884 | NC_050884 |
| 23 | <i>Odorrana huanggangensis</i>           | MK650099          | KF185059  | –         |
| 24 | <i>Odorrana exiliversabilis</i>          | NC_053712         | KF185056  | NC_053712 |
| 25 | <i>Pelophylax nigromaculatus</i>         | KT878718          | KT878718  | KT878718  |
| 26 | <i>Rana longicrus</i>                    | MZ680528          | MZ680528  | MZ680528  |
| 27 | <i>Polypedates braueri</i>               | NC_042797         | NC_042797 | NC_042797 |
| 28 | <i>Zhangixalus dennysi</i>               | NC_027452         | NC_027452 | NC_027452 |
| 29 | <i>Ichthyophis bannanicus</i> (outgroup) | NC_006404         | NC_006404 | NC_006404 |

**Table S3.** Regression equations and coefficients between diversity indices and elevation.

| Diversity index                      | Regression equation                                                     | Regression coefficient |
|--------------------------------------|-------------------------------------------------------------------------|------------------------|
| Simpson index                        | $y = -0.445 + 0.0057x - 7.80 \cdot 10^{-6}x^2 + 3.17 \cdot 10^{-9}x^3$  | 0.84                   |
| Shannon-Wiener index                 | $y = -1.687 + 0.0184x - 2.59 \cdot 10^{-5}x^2 + 1.01 \cdot 10^{-8}x^3$  | 0.80                   |
| Pielou index                         | $y = 1.114 - 0.0042x + 5.19 \cdot 10^{-6}x^2 - 1.58 \cdot 10^{-9}x^3$   | 0.87                   |
| Margalef index                       | $y = -0.453 + 0.0189x - 2.93 \cdot 10^{-5}x^2 + 1.23 \cdot 10^{-8}x^3$  | 0.65                   |
| Species richness                     | $y = 28.34 - 0.0392x + 4.75 \cdot 10^{-5}x^2 - 3.24 \cdot 10^{-8}x^3$   | 0.82                   |
| Faith's phylogenetic diversity index | $y = 2.61 + 0.0227x - 4.52 \cdot 10^{-5}x^2 + 2.37 \cdot 10^{-8}x^3$    | 0.71                   |
| Net relatedness index                | $y = -0.2989 + 0.0074x - 1.42 \cdot 10^{-5}x^2 + 8.33 \cdot 10^{-9}x^3$ | 0.78                   |
| Nearest taxon index                  | $y = -0.1825 + 0.0042x - 8.55 \cdot 10^{-6}x^2 + 5.57 \cdot 10^{-9}x^3$ | 0.95                   |
